# Supplementary material for: The transformation mechanisms among cuboctahedra, Ino's decahedra and icosahedra structures of magic-size gold nanoclusters
Source: Royal Society of Chemistry journal article supplement (doi:10.1039/d6na00012f), 2026-05-19
Supplement: d6na00012f1.zip [file SI.pdf › SupportingInformation/SI.pdf]

## Supporting Information:

The transformation mechanisms among cuboctahedra, Ino's decahedra and icosahedra structures of magic-size gold nanoclusters

Ehsan Rahmatizad Khajehpasha, Mohammad Ismaeil Safa, Nasrin Eyvazi  
Marco Krummenacher, Stefan Goedecker

## S1 Trainig Dataset

The training dataset was generated iteratively over five MH iterations. After each iteration, local minima together with high-energy structures on the MLIP PES were selected. Their energies and forces were computed using DFT with the settings listed in table SI. The MLIP model was then fine-tuned and used in the subsequent MH iteration. This procedure was repeated until a reliable MLIP was obtained. The energy and size distributions of the final dataset are shown in figures S1 and S2, respectively. Figure S3 depicts the energy correlation for nanoclusters of magic sizes that were excluded from the training dataset. Although only nanoclusters containing up to 90 atoms were included during training, the MLIP successfully extrapolates the PES to larger nanoclusters, achieving a root mean square error of  $\approx 5$  meV/atom and a correlation of 99.7% with the reference energies.

**Table SI** INCAR parameters used for a non-spin-polarized DFT calculation of Au

| Tag    | Value              |
|--------|--------------------|
| PREC   | Accurate           |
| ISPIN  | 1                  |
| LREAL  | Auto               |
| ROPT   | 1E-4 1E-4 1E-4     |
| ALGO   | Fast               |
| ISIF   | 0                  |
| ISYM   | 0                  |
| ISMEAR | 0                  |
| SIGMA  | 0.05               |
| POTIM  | 0.04               |
| EDIFF  | $1 \times 10^{-6}$ |
| GGA    | PE #PBE            |
| NSW    | 0                  |
| ENCUT  | 250                |
| ENAUG  | 800                |

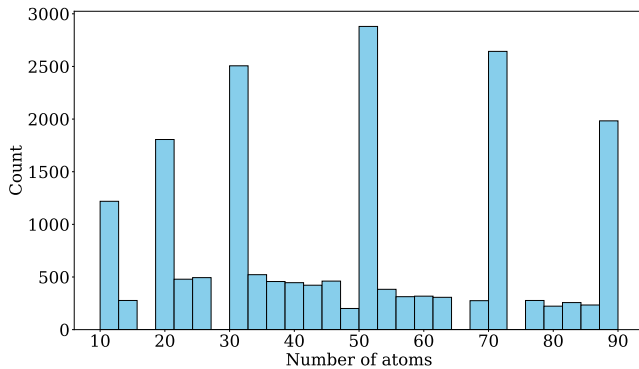

**Fig. S1** Histogram for the size of structures in the training dataset.

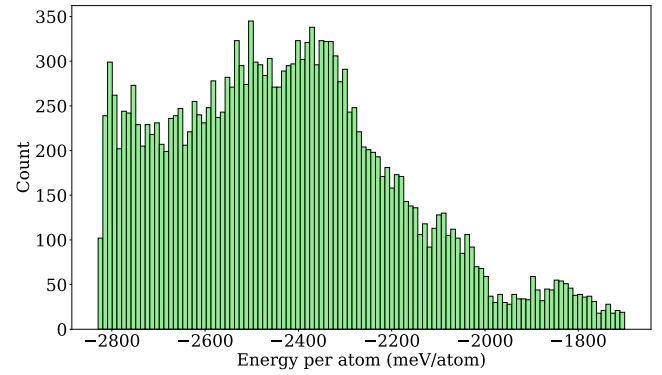

**Fig. S2** Histogram for the energy of structures in the training dataset

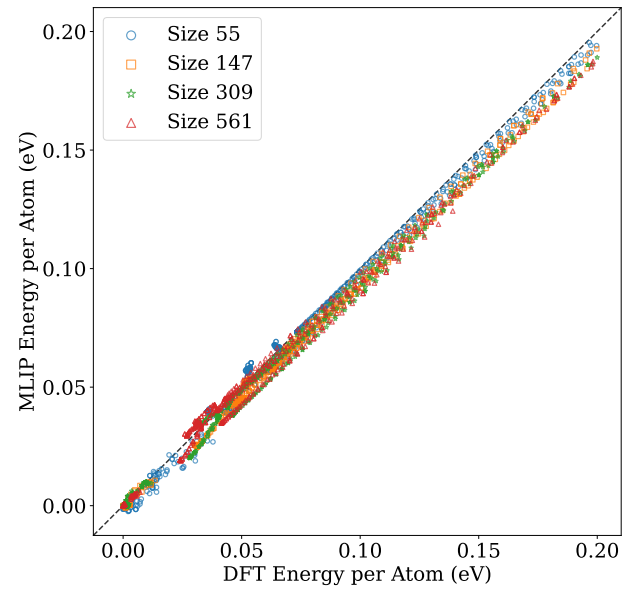

**Fig. S3** Correlation of the energies calculated by the MLIP for the structures excluded from the training dataset of the MLIP.

## S2 Saddle Point Search

Figure S4 shows an example of Python code for biased MH, with biasing weights listed in table SII for different transformations and sizes. The high-symmetry transformation pathways from biased MH were further optimized using the parameters in table SIII.

To assess the accuracy of the MLIP in describing energies and forces along transformation pathways, VASP NEB calculations were performed for Au<sub>55</sub> and Au<sub>147</sub> using the settings in table SIV, providing DFT-level validation of the predicted pathways and energy barriers.

While NEB captured high-symmetry transformations, it failed to locate saddle points for asymmetric transformations; these were instead obtained using COMPASS with the parameters in table SV.

```

from ase.io import read
from nequip.ase import NequIPCalculator
from minimahopping.minhop import Minimahopping
from biascalc.laplace_calculator
    import LaplaceCalculator

target_configuration = read(
    'TargetStr.extxyz', format='extxyz'
)
configuration = read(
    'InputStr.extxyz', format='extxyz'
)
calculator = NequIPCalculator.from_deployed_model(
    model_path="b1_l1_r55n3f48.pth",
    device="cuda",
    species_to_type_name={"Au": "Au"},
)
bias_calculator = (
    LaplaceCalculator(
        target_configuration,
        bias=float('WBIAS')
    ).add_calculator(calculator)
)

configuration.calc = bias_calculator
with Minimahopping(
    configuration,
    md_calculator=bias_calculator,
    T0=300,
    dt0=1e-3,
    mdmin=1,
    n_soft=20,
    soften_positions=5e-2,
    fingerprint_threshold=0.1
) as mh:
    mh(totalsteps=500)

```

**Fig. S4** Example Python code for performing biased MH with an MLIP and Laplace fingerprint biasing within the ASE framework.

**Table SII** Bias weight ( $\omega$  in biased MH for the high-symmetry transformations

| Transformation                     | Au <sub>55</sub> | Au <sub>147</sub> | Au <sub>309</sub> | Au <sub>561</sub> |
|------------------------------------|------------------|-------------------|-------------------|-------------------|
| O <sub>h</sub> → I <sub>h</sub>    | 0.4              | 1.3               | 1.1               | 1.0               |
| I-D <sub>5h</sub> → I <sub>h</sub> | 2.2              | 2.1               | 1.6               | 1.4               |
| I <sub>h</sub> → O <sub>h</sub>    | 6.2              | 3.9               | 2.7               | 1.8               |
| I <sub>h</sub> → I-D <sub>5h</sub> | 6.2              | 3.9               | 2.8               | 2.0               |

**Table SIII** Parameters used for the nudged elastic band calculation with MLIP for 21 images, optimized using the FIRE algorithm

| Component | Parameter                       | Value       |
|-----------|---------------------------------|-------------|
| NEB       | climb                           | True        |
| NEB       | Spring constant $k$             | 3.0         |
| NEB       | allow_shared_calculator         | True        |
| NEB       | remove_rotation_and_translation | True        |
| FIRE      | dtmax                           | 0.01        |
| FIRE      | maxstep                         | 0.01        |
| FIRE      | fmax                            | 0.005 #eV/Å |

**Table SIV** INCAR parameters used for the nudged elastic band calculation of Au. The higher spring constant value compared to MLIP nudged elastic band calculation (table SIII) is due to a lower number of images

| Tag    | Value                  |
|--------|------------------------|
| PREC   | Accurate               |
| ISPIN  | 1                      |
| LREAL  | Auto                   |
| ROPT   | 1E-4 1E-4 1E-4         |
| LPLANE | .TRUE.                 |
| ALGO   | Fast                   |
| NELM   | 300                    |
| NELMIN | 5                      |
| EDIFF  | $1 \times 10^{-8}$ #eV |
| ISMEAR | 0                      |
| SIGMA  | 0.05 eV                |
| ISYM   | 0                      |
| GGA    | PE # (PBE)             |
| ENCUT  | 300 eV                 |
| ENAU   | 900 eV                 |
| IBRION | 1                      |
| POTIM  | 0.5                    |
| EDIFFG | -0.010 #eV/Å           |
| ISIF   | 0                      |
| NSW    | 1000                   |
| IMAGES | 7                      |
| SPRING | -5.0                   |
| LCLIMB | .TRUE.                 |

**Table SV** Input parameters of COMPASS calculations

| Parameter                   | Value |
|-----------------------------|-------|
| minimize_input              | True  |
| nsteps                      | 10000 |
| nloops                      | 200   |
| forcetol                    | 0.005 |
| forcetolperdistance         | 0.005 |
| distancestepmax             | 1.0   |
| distancestepmin             | 0.001 |
| targetdistancesaddle        | 0.1   |
| targetdistanceother         | 0.2   |
| energydifferencecethreshold | 0.005 |
| nsplitdouble                | 2     |
| nsplitsingle                | 1     |
| alpha0                      | 0.001 |
| trustradius                 | 0.05  |
| trustedforcedifference      | 0.5   |
| extracurv                   | False |
| saddle_cosp                 | 0.7   |
| nhistx                      | 10    |
| restart_level               | 2     |
| restart_interval            | 1     |
| basename                    | clog_ |
| minimize_fmax               | 0.001 |
| minimize_nsteps             | 4000  |
| minimize_maxrise            | 0.005 |
| parallel                    | False |
| incremental_projection      | True  |
| interpolation_idpp          | False |
| scalar_pressure             | 0.0   |

### S3 Ionized NEB of Au<sub>55</sub>

To assess the effect of ionization on high-symmetry transformation pathways, we performed NEB calculations for Au<sub>55</sub> using the FHI-aims code with an intermediate basis set. The NEB was relaxed to a force tolerance of ten meV/atom. The parameters used in these calculations are listed in table SVI, with the total charge adjusted according to the ionization state<sup>1,2</sup>.

**Table SVI** FHI-aims parameters used for NEB calculations of ionized Au<sub>55</sub>

| Parameter                 | Value                      |
|---------------------------|----------------------------|
| Exchange-correlation (xc) | PBE                        |
| Total charge              | Ionization state dependent |
| Spin treatment            | none                       |
| Relativistic treatment    | atomic_zora scalar         |
| Compute forces            | true                       |
| SCF energy convergence    | $1 \times 10^{-6}$         |
| SCF force convergence     | $1 \times 10^{-4}$         |

**Table SVII** RMSD values (Å) for each image relative to the corresponding structure in the neutral Au<sub>55</sub> high-symmetry transformation pathway.

|                            | Image # | Au <sub>55</sub> <sup>-2</sup> | Au <sub>55</sub> <sup>-1</sup> | Au <sub>55</sub> <sup>+1</sup> | Au <sub>55</sub> <sup>+2</sup> |
|----------------------------|---------|--------------------------------|--------------------------------|--------------------------------|--------------------------------|
| $O_h \rightarrow I_h$      | 1       | 0.024                          | 0.008                          | 0.008                          | 0.016                          |
|                            | 2       | 0.033                          | 0.009                          | 0.011                          | 0.016                          |
|                            | 3       | 0.050                          | 0.011                          | 0.018                          | 0.015                          |
|                            | 4       | 0.053                          | 0.015                          | 0.027                          | 0.025                          |
|                            | 5       | 0.039                          | 0.013                          | 0.023                          | 0.019                          |
|                            | 6       | 0.025                          | 0.009                          | 0.016                          | 0.013                          |
|                            | 7       | 0.014                          | 0.006                          | 0.008                          | 0.009                          |
|                            | 8       | 0.008                          | 0.004                          | 0.004                          | 0.008                          |
| $I-D_{5h} \rightarrow I_h$ | 1       | 0.056                          | 0.026                          | 0.030                          | 0.022                          |
|                            | 2       | 0.058                          | 0.029                          | 0.030                          | 0.027                          |
|                            | 3       | 0.054                          | 0.033                          | 0.029                          | 0.030                          |
|                            | 4       | 0.057                          | 0.025                          | 0.028                          | 0.029                          |
|                            | 5       | 0.053                          | 0.024                          | 0.030                          | 0.024                          |
|                            | 6       | 0.051                          | 0.024                          | 0.026                          | 0.019                          |
|                            | 7       | 0.049                          | 0.023                          | 0.023                          | 0.013                          |
|                            | 8       | 0.008                          | 0.004                          | 0.004                          | 0.008                          |

**Table SVIII** Minimum and maximum atomic displacements in Å during Au<sub>55</sub> high-symmetry transformations calculated with FHI-Aims for different ionization states, excluding the innermost atom. The values in parentheses are from table 2, i.e. were obtained from MLIP calculations.

| Transformation             | Ionization State | Min (Å)   | Max (Å)   |
|----------------------------|------------------|-----------|-----------|
| $O_h \rightarrow I_h$      | -2               | 0.6       | 1.3       |
|                            | -1               | 0.6       | 1.3       |
|                            | 0                | 0.6 (0.4) | 1.3 (1.3) |
|                            | +1               | 0.6       | 1.3       |
|                            | +2               | 0.7       | 1.3       |
| $I-D_{5h} \rightarrow I_h$ | -2               | 0.1       | 1.6       |
|                            | -1               | 0.1       | 1.6       |
|                            | 0                | 0.1 (0.1) | 1.6 (1.5) |
|                            | +1               | 0.1       | 1.6       |
|                            | +2               | 0.1       | 1.6       |

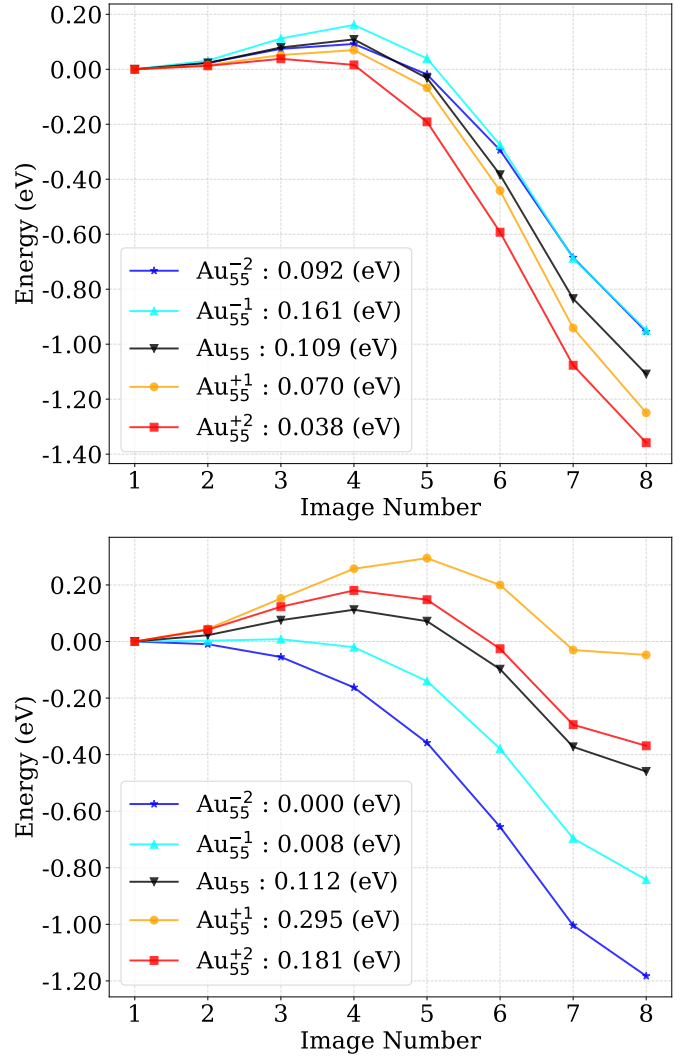

**Fig. S5** The energy of NEB pathways calculated using FHI-aims for different ionization states of Au<sub>55</sub> for the  $O_h \rightarrow I_h$  (top) and  $I-D_{5h} \rightarrow I_h$  (bottom) transformations. The values in the legend indicate the corresponding barrier heights for each ionization state.

Table SVII summarizes the RMSD of each image along the high-symmetry transformation pathway for different ionization states relative to neutral Au<sub>55</sub>. Table SVIII presents the corresponding atomic displacement amplitudes during these transformations. Notably, the RMSD values are approximately an order of magnitude smaller than the minimum atomic displacements observed, demonstrating in this way that the transformation pathway is quite insensitive to the ionization state. Further comparison with figure S5 shows that, while ionization does not significantly alter the geometries along the high-symmetry transformation pathways, it does affect the associated barrier heights.



## S4 Global Optimization

Table SIX presents the parameters used in MH to explore the PES in the pursuit of identifying the GM. Newly identified GM structures were further relaxed using VASP with the parameters listed in table SX.

**Table SIX** Parameters used for the Minima Hopping global optimization run

| Parameter                             | Value              |
|---------------------------------------|--------------------|
| $T_0$                                 | 600                |
| $\Delta t_0$                          | $1 \times 10^{-2}$ |
| $E_{\text{diff},0}$                   | 0.1                |
| Fingerprint threshold                 | 0.005              |
| Energy threshold                      | 0.010              |
| MD minimum steps                      | 10                 |
| Softening steps ( $n_{\text{soft}}$ ) | 100                |
| $f_{\text{max}}$                      | $1 \times 10^{-3}$ |
| MPI enabled                           | True               |
| Total steps                           | 4000               |

**Table SX** INCAR parameters used for a spin-polarized DFT calculation of gold with dipole corrections. To disable geometry optimization for single-point calculations, NSW was set to zero

| Tag    | Value              |
|--------|--------------------|
| PREC   | Accurate           |
| ISPIN  | 2                  |
| LDIPOL | .TRUE.             |
| IDIPOL | 4                  |
| DIPOL  | 0.5 0.5 0.5        |
| LREAL  | Auto               |
| ROPT   | 1E-4 1E-4 1E-4     |
| LPLANE | .TRUE.             |
| ALGO   | Normal             |
| NELM   | 1000               |
| ISIF   | 0                  |
| ISYM   | 0                  |
| ISMear | 0                  |
| SIGMA  | 0.0005             |
| IBRION | 2                  |
| POTIM  | 0.1                |
| EDIFFG | -0.001             |
| EDIFF  | $1 \times 10^{-9}$ |
| GGA    | PE                 |
| NSW    | 1000               |
| ENCUT  | 300 #eV            |

## S5 Energy Profiles Along Low-Frequency Mode

Figure S6 shows the energy profile of structures displaced along the lowest positive mode. The softness of these modes introduces significant numerical noise in vibrational analysis using the finite-difference method.

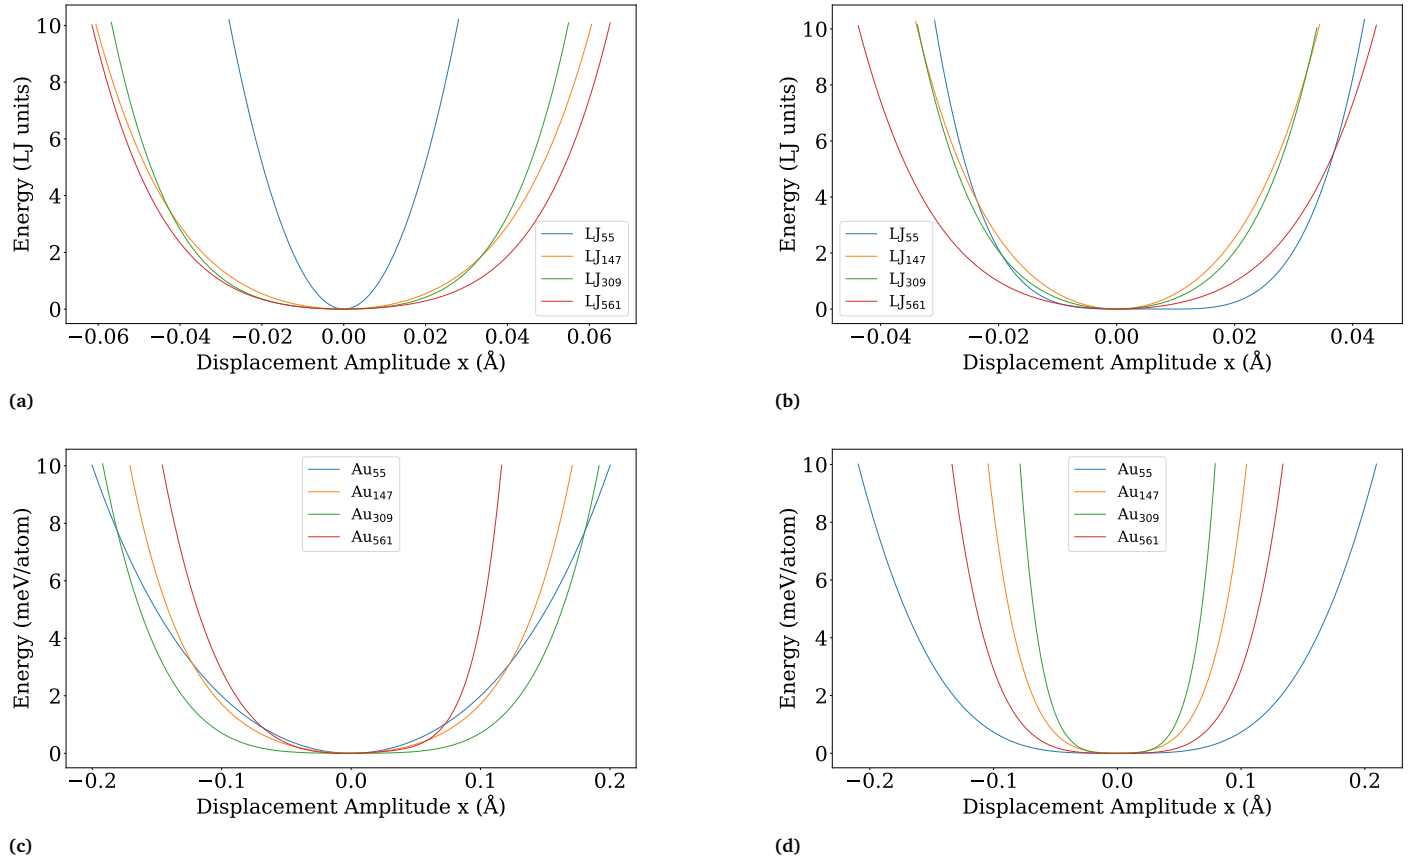

**Fig. S6** The energy profile for the saddle points of LJ-O<sub>h</sub> → LJ-I<sub>h</sub> (a), LJ-I-D<sub>5h</sub> → LJ-I<sub>h</sub> (b), Au-O<sub>h</sub> → Au-I<sub>h</sub> (c), Au-I-D<sub>5h</sub> → Au-I<sub>h</sub> (d) transformations displaced parallel to the softest positive mode. The negative sign of the *displacement amplitude*  $x$  represents a displacement antiparallel to the softest positive mode.

## S6 Role of Soft Modes in and asymmetric Transformations

Figure S7 illustrates the angles between the vector connecting the initial structure to the asymmetric transformation saddle point and the individual vibrational mode eigenvectors, thereby quantifying the contribution of each mode in initiating the transformation to the low-energy asymmetric saddle points. While high-symmetry transformation pathways are largely aligned only with the softest vibrational mode, asymmetric transformations involve contributions from multiple vibrational modes along the pathway to the saddle point, where soft modes play a dominant role. Since high-symmetry pathways and their dominance by the softest mode have already been discussed in section 3.2, they are not revisited here.

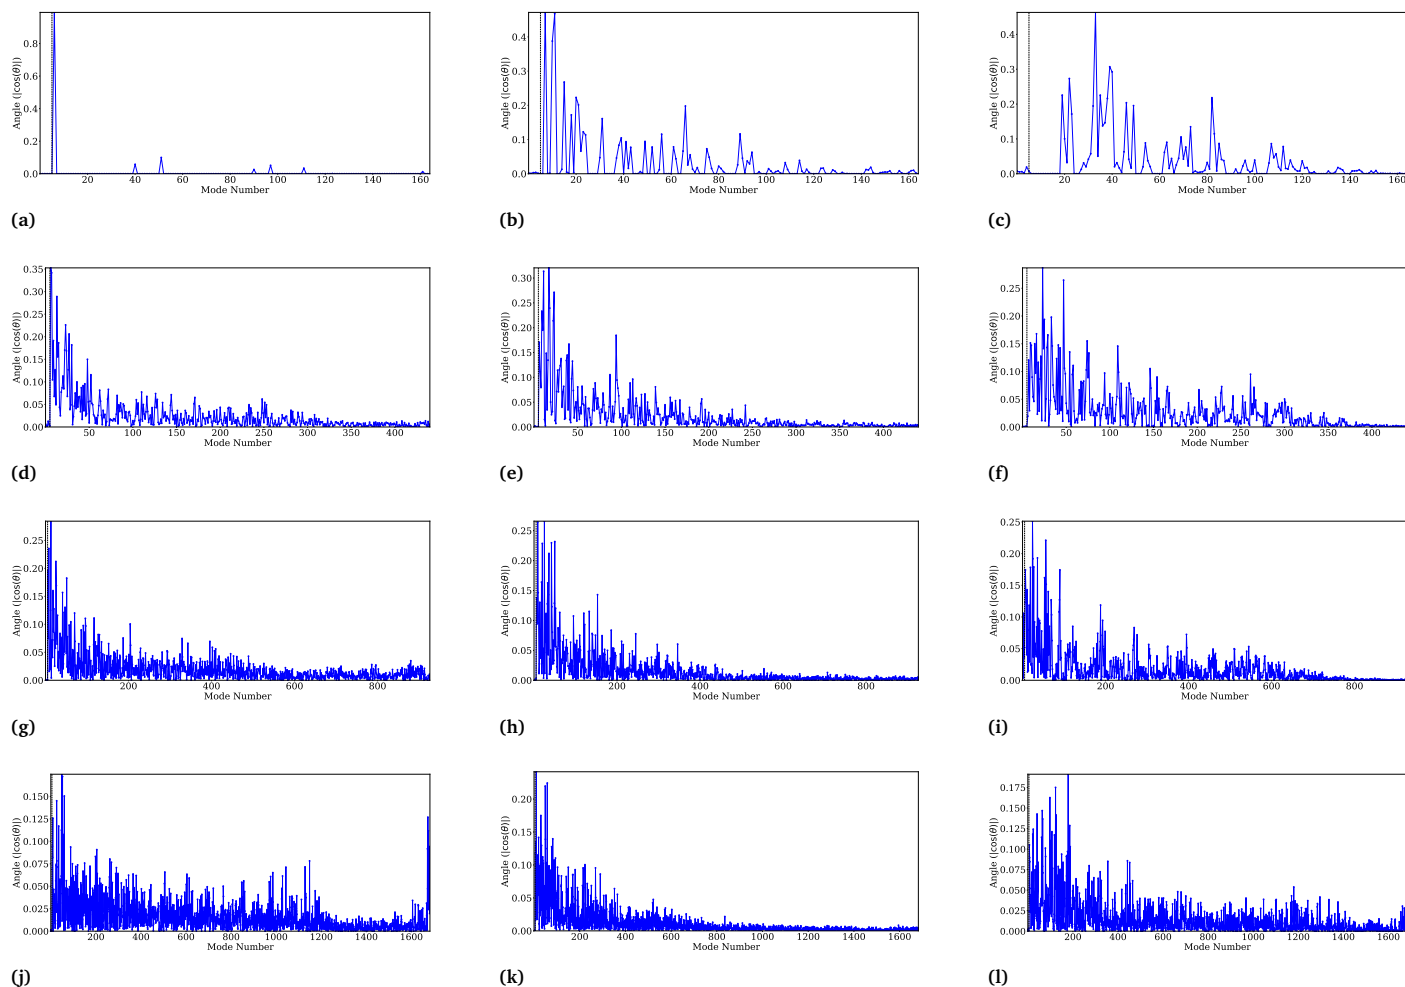

**Fig. S7** The angles between the vector connecting the initial structure to the asymmetric transformation saddle point and each vibrational mode are shown. Columns correspond to the initial structures:  $O_h$  (left),  $I-D_{5h}$  (middle), and  $I_h$  (right). Rows correspond to nanocluster sizes:  $Au_{55}$  (first),  $Au_{147}$  (second),  $Au_{309}$  (third), and  $Au_{561}$  (fourth).

## S7 Minimum Energy Pathways and Vibrational Modes

The minimum energy pathways for high-symmetry structural transformations of Au nanoclusters are shown in figure S8. The top row corresponds to the  $I-D_{5h} \rightarrow I_h$  transformations of  $Au_{147}$ ,  $Au_{309}$ , and  $Au_{561}$ , while the bottom row depicts the  $O_h \rightarrow I_h$  transformations for the same nanocluster sizes. Each transformation pathway is accompanied by the corresponding softest vibrational mode, and the atomic coordinates for each step are provided in the **pathway** directory of the supplementary material for detailed visualization.

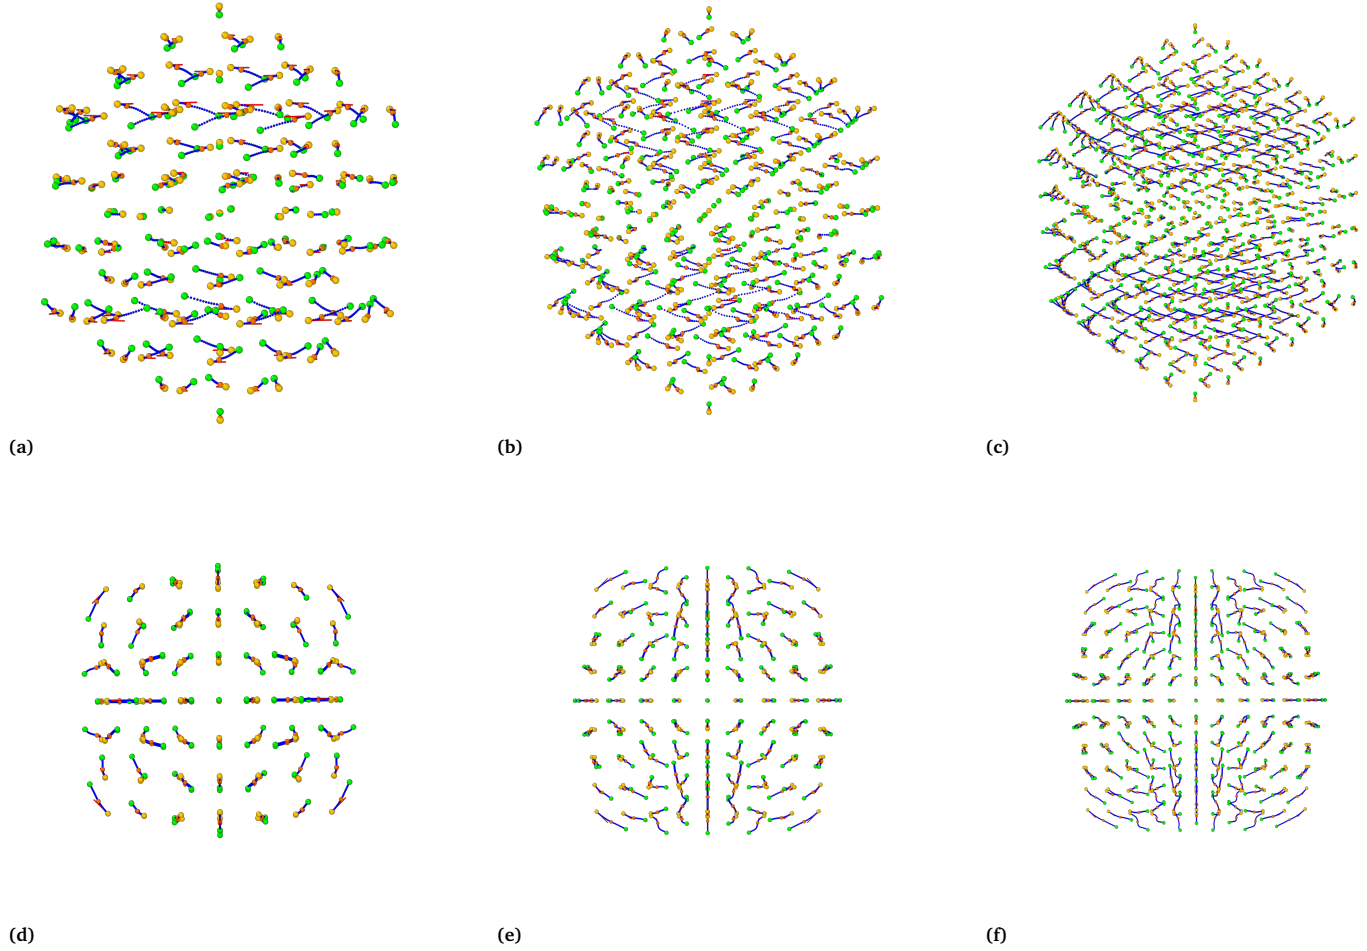

**Fig. S8** High-symmetry transformation pathways of Au nanoclusters. Top row: side views of  $I-D_{5h} \rightarrow I_h$  transformations for  $Au_{147}$  (a),  $Au_{309}$  (b), and  $Au_{561}$  (c). Bottom row: (100) views of  $O_h \rightarrow I_h$  transformations for the same nanoclusters (d–f). Golden spheres represent initial structures, green spheres indicate the final  $I_h$  configuration, red lines show the softest vibrational mode, blue lines trace the NEB pathway, and orange highlights the saddle-point configuration.

## Notes and references

- 1 V. Blum, R. Gehrke, F. Hanke, P. Havu, V. Havu, X. Ren, K. Reuter and M. Scheffler, *Computer Physics Communications*, 2009, **180**, 2175–2196.
- 2 A. Marek, V. Blum, R. Johanni, V. Havu, B. Lang, T. Auckenthaler, A. Heinecke, H.-J. Bungartz and H. Lederer, *Journal of Physics: Condensed Matter*, 2014, **26**, 213201.
